# Supplementary material for: Metal ion-mediated synthesis and shape-dependent magnetic properties of single-crystalline α-Fe2O3 nanoparticles
Source: Royal Society of Chemistry journal article supplement (doi:10.1039/c4ce00048j), 2014-01-01
Supplement: c4ce00048j1.pdf [file c4ce00048j1.pdf]

## Support Information

### Metal Ion-Mediated Synthesis and Shape-dependent Magnetic Properties of Single-Crystalline $\alpha$ - $\text{Fe}_2\text{O}_3$ Nanoparticles

*Wei Wu<sup>1,2,4\*</sup>, Shuanglei Yang<sup>3,4</sup>, Jun Pan<sup>3</sup>, Lingling Sun<sup>2</sup>, Juan Zhou<sup>2</sup>, Zhigao Dai,<sup>2</sup> Xiangheng Xiao<sup>2</sup>,  
Hongbo Zhang<sup>3</sup>, Changzhong Jiang<sup>2\*</sup>*

<sup>1</sup> Laboratory of Functional Materials and Printing Electronics, School of Printing and Packaging, Wuhan University, Wuhan 430072, P. R. China

<sup>2</sup> Key Laboratory of Artificial Micro- and Nano-structures of Ministry of Education, School of Physics and Technology, Wuhan University, Wuhan 430072, P. R. China

<sup>3</sup> State Key Laboratory for Powder Metallurgy, Central South University, Changsha 410083, P. R. China

<sup>4</sup> the authors contributed equally to this work.

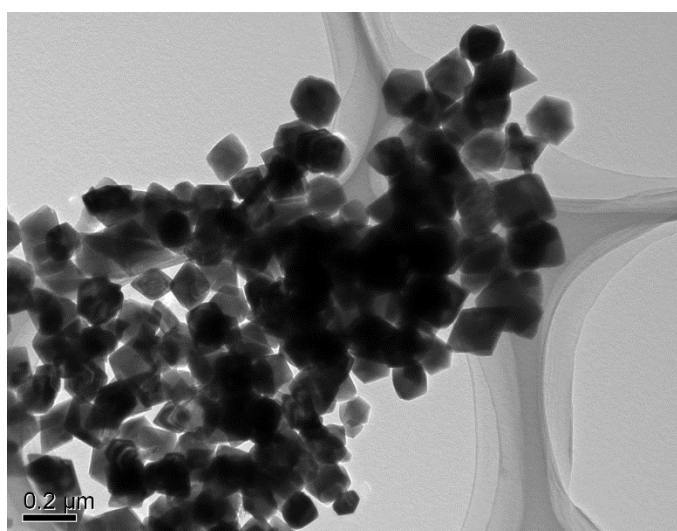

**Figure S1** TEM image of the samples when the absence of ions additive.

\*To whom correspondence should be addressed. Tel: +86-27-68778529. Fax: +86-27-68778433. E-mail: [weiwu@whu.edu.cn](mailto:weiwu@whu.edu.cn) (W. Wu) and [czjiang@whu.edu.cn](mailto:czjiang@whu.edu.cn) (C. Jiang).

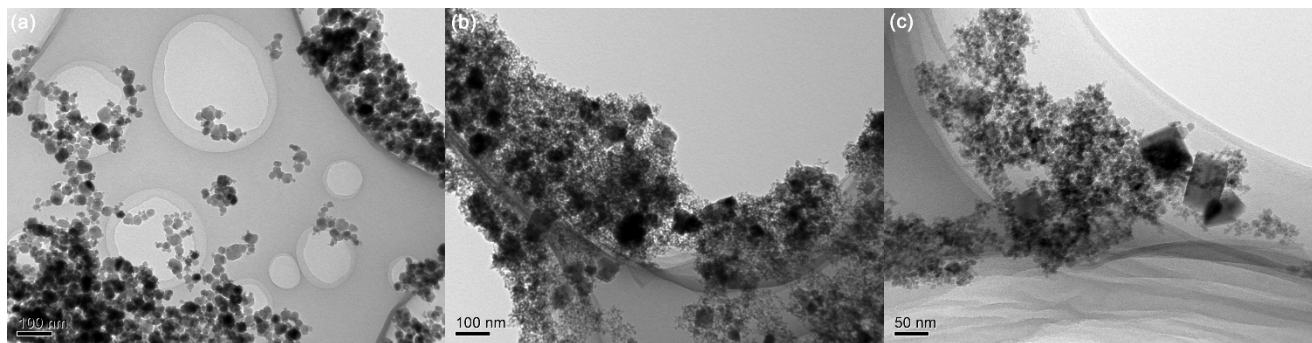

**Figure S2** TEM images of the samples when the absence of the other metal ions: Ni ions (a), Mn ions (b), and Co ions (c).

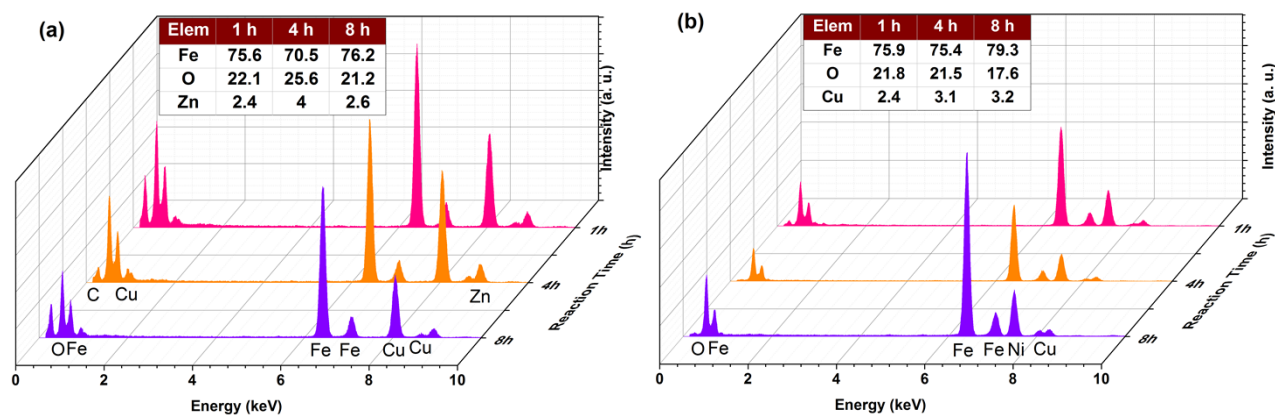

**Figure S3** The EDX spectra of cubic  $\alpha$ -Fe<sub>2</sub>O<sub>3</sub> particles (a, C and Cu elements comes from the carbon films coated copper grid) and thorhombic  $\alpha$ -Fe<sub>2</sub>O<sub>3</sub> particles (b, the Ni element comes from the nickel grid) with different reaction times.

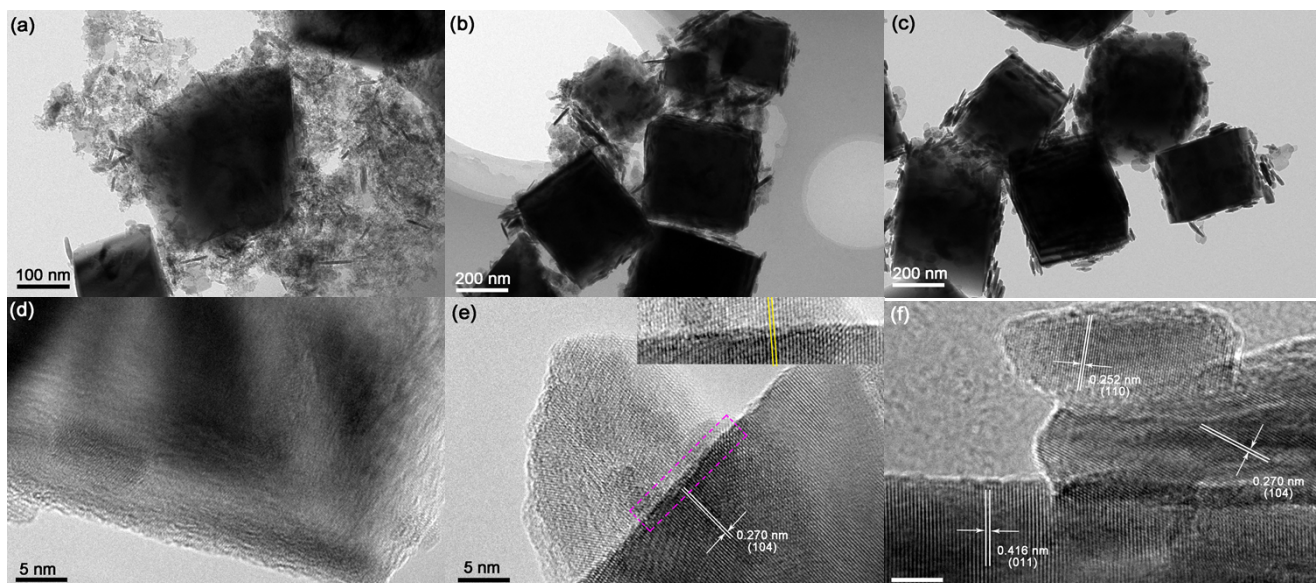

**Figure S4** TEM and HRTEM images of morphology evolution of the cubic  $\alpha\text{-Fe}_2\text{O}_3$  particles with different reaction time: (a, c) 1 h, (b, d) 4 h, and (d, f) 8 h, the scale bar is 5 nm.

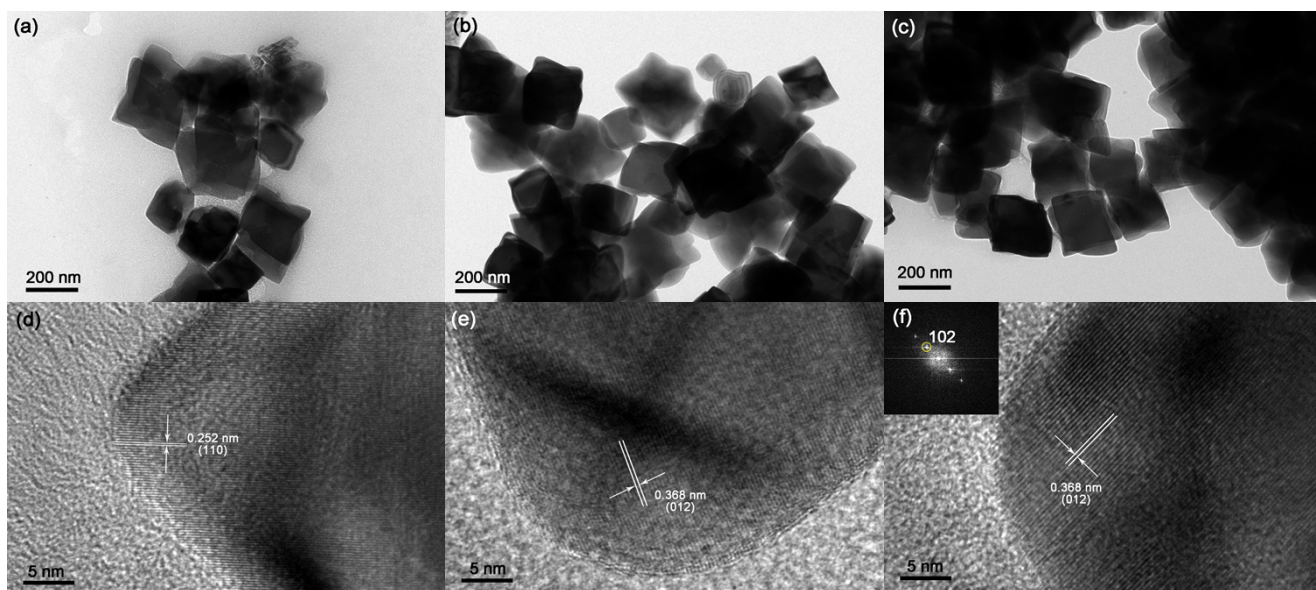

**Figure S5** TEM and HRTEM images of morphology evolution of the thorhombic  $\alpha\text{-Fe}_2\text{O}_3$  particles with different reaction time: (a, c) 1 h, (b, d) 4 h, and (d, f) 8 h.
